# Supplementary material for: Isoform specific gene expression analysis of KRAS in the prognosis of lung adenocarcinoma patients
Source: PubMed Central journal article supplement (PMC6389035; doi:10.1186/s12859-018-2011-y), 2018-02-19
Supplement: 12859_2018_2011_MOESM1_ESM.pdf [file 12859_2018_2011_MOESM1_ESM.pdf]

Research Article

# **Isoform specific gene expression analysis of *KRAS* in the prognosis of lung adenocarcinoma patients**

In Seok Yang<sup>1</sup> and Sangwoo Kim<sup>1,\*</sup>

<sup>1</sup>Severance Biomedical Science Institute, Yonsei University College of Medicine, 50-1 Yonsei-ro, Seoul 03722, Korea

\*Corresponding author:

Sangwoo Kim, Ph.D.

Tel: +82-2-2228-0913

Email: swkim@yuhs.ac

Running title: Isoform specific expression of *KRAS*

## Supplementary Information

Table S1. Somatic mutation and RNA-seq data files downloaded for the LUAD cancer type from the TCGA Data Portal (<https://tcga-data.nci.nih.gov/docs/publications/tcga/>), which can be currently found in Genomic Data Commons Legacy Archive (<https://portal.gdc.cancer.gov/legacy-archive/search/f>) maintained by the National Cancer Institute.

| Cancer types | Data types       | Levels   | Files                                                                                           |
|--------------|------------------|----------|-------------------------------------------------------------------------------------------------|
| LUAD         | Somatic mutation | 2.1.5.0  | PR_TCGA_LUAD_PAIR_Capture_All_Pairs_QCPASS_v4.aggreated.capture.tcga.uuid.automated.somatic.maf |
|              |                  | 3.1.14.0 | unc.edu_LUAD.IlluminaHiSeq_RNASeqV2.Level_3.1.14.0                                              |
|              | RNA-seq          | 3.1.0.0  | unc.edu_LUAD.IlluminaHiSeq_TotalRNASeqV2.Level_3.1.0.0                                          |

LUAD, lung adenocarcinoma

Table S2. Somatic mutation and RNA-seq data files downloaded for COAD, PAAD, and READ cancer types from the TCGA Data Portal (<https://tcga-data.nci.nih.gov/docs/publications/tcga/>), which are currently found in the Genomic Data Commons Legacy Archive (<https://portal.gdc.cancer.gov/legacy-archive/search/f>) maintained by National Cancer Institute.

| Cancer types | Data types       | Levels   | Files                                                         |
|--------------|------------------|----------|---------------------------------------------------------------|
| COAD         | Somatic mutation | 3.1.1.0  | unc.edu_COAD.IlluminaGA_RNASeqV2.Level_3.1.1.0                |
|              |                  | 3.1.12.0 | unc.edu_COAD.IlluminaHiSeq_RNASeqV2.Level_3.1.12.0            |
|              |                  | 3.1.0.0  | unc.edu_COAD.IlluminaHiSeq_TotalRNASeqV2.Level_3.1.0.0        |
|              | RNA-seq          | 2.1.5.0  | hgsc.bcm.edu_COAD.IlluminaGA_DNASeq.1.somatic.maf             |
| PAAD         | Somatic mutation | 2.1.10.0 | PAAD_pairs.aggregated.capture.tcga.uuid.automated.somatic.maf |
|              | RNA-seq          | 3.1.8.0  | unc.edu_PAAD.IlluminaHiSeq_RNASeqV2.Level_3.1.8.0             |
| READ         | Somatic mutation | 2.1.6.0  | hgsc.bcm.edu_READ.IlluminaGA_DNASeq.1.somatic.maf             |
|              | RNA-seq          | 3.1.0.0  | unc.edu_READ.IlluminaGA_RNASeqV2.Level_3.1.0.0                |
|              |                  | 3.1.9.0  | unc.edu_READ.IlluminaHiSeq_RNASeqV2.Level_3.1.9.0             |

COAD, colon adenocarcinoma; PAAD, pancreatic adenocarcinoma; READ, rectal adenocarcinoma.

Table S3. Median values of expression levels or proportions of K-Ras isoforms, which were used to divide patients of each cancer type into two groups

| Cancer types | K-Ras4A isoform         |             | K-Ras4B isoform         |             |
|--------------|-------------------------|-------------|-------------------------|-------------|
|              | Expression levels (TPM) | Proportions | Expression levels (TPM) | Proportions |
| COAD         | 3.4652805               | 0.2197325   | 12.105005               | 0.7802675   |
| LUAD         | 3.408776                | 0.1659475   | 16.557391               | 0.8340525   |
| PAAD         | 3.558625                | 0.207049    | 13.170599               | 0.792951    |
| READ         | 3.071302                | 0.210092    | 11.38283                | 0.789908    |

COAD, colon adenocarcinoma; LUAD, lung adenocarcinoma; PAAD, pancreatic adenocarcinoma; READ, rectal adenocarcinoma.

Table S4. Combined result of Cox regression analysis according to the states of K-Ras4A expression and proportion for LUAD patients with *KRAS* mutations

| Covariates                                   | Combined result of K-Ras4A expression and proportion |                 |                       |                 |
|----------------------------------------------|------------------------------------------------------|-----------------|-----------------------|-----------------|
|                                              | Univariate analysis                                  |                 | Multivariate analysis |                 |
|                                              | HR<br>(95% CI)                                       | <i>p</i> -value | HR<br>(95% CI)        | <i>p</i> -value |
| Age ( $\geq 65$ )                            | 1.326 (0.761–2.312)                                  | 0.320           | 1.456 (0.786–2.697)   | 0.232           |
| Gender (Male)                                | 1.536 (0.891–2.650)                                  | 0.123           | 1.733 (0.949–3.164)   | 0.0737          |
| Smoking history                              | 1.076 (0.804–1.440)                                  | 0.622           | 1.181 (0.858–1.627)   | 0.308           |
| K-Ras4A expression and proportion (High/Low) | 2.009 (0.866–4.661)                                  | 0.104           | 2.584 (1.015–6.578)   | 0.0464          |
| K-Ras4A expression and proportion (Low/High) | 1.318 (0.307–5.663)                                  | 0.710           | 4.905 (1.110–21.684)  | 0.0360          |
| K-Ras4A expression and proportion (Low/Low)  | 2.427 (1.309–4.501)                                  | 4.88E-3         | 2.816 (1.453–5.459)   | 2.17E-3         |
| Pathological stage (III/IV)                  | 3.088 (1.747–5.459)                                  | 1.05E-04        | 3.483 (1.903–6.376)   | 5.23E-5         |

HR, hazard ratio; CI, confidence interval.
